# Supplementary material for: Predictive Factors of Ventilatory Support in Chest Trauma
Source: MDPI journal article supplement (doi:10.3390/life11111154), 2021-10-29
Supplement: s1 [file s1]

Table S1: population data

|                                     |               | POPULATION |        |        |        |       |        |      |
|-------------------------------------|---------------|------------|--------|--------|--------|-------|--------|------|
|                                     |               | n          | %      | Mean   | SD     | IQR1  | Median | IQR3 |
| Gender                              | female        | 179        | 21.51% |        |        |       |        |      |
|                                     | male          | 653        | 78.49% |        |        |       |        |      |
| Age                                 |               |            |        | 51     | 17     | 38    | 49     | 62   |
| Age >65                             | yes           | 651        | 78.10% |        |        |       |        |      |
|                                     | no            | 181        | 21.70% |        |        |       |        |      |
| Age >75                             | yes           | 737        | 88.40% |        |        |       |        |      |
|                                     | no            | 94         | 11.30% |        |        |       |        |      |
| ASA score                           | 1             | 508        | 60.90% |        |        |       |        |      |
|                                     | 2             | 266        | 31.90% |        |        |       |        |      |
|                                     | 3             | 55         | 6.60%  |        |        |       |        |      |
|                                     | 4             | 2          | 0.20%  |        |        |       |        |      |
| RTS pre-hosp                        |               |            |        | 11     | 2.256  | 11    | 12     | 12   |
| SpO2 pre-hosp                       |               |            |        | 95     | 13.533 | 95    | 98     | 99   |
| GCS pre-hosp                        |               |            |        | 13     |        | 13    | 15     | 15   |
| RTS in ED                           |               |            |        | 10     | 3.823  | 4     | 12     | 12   |
| SpO2 in ED                          |               |            |        | 97     | 6.216  | 96    | 99     | 100  |
| GCS in ED                           |               |            |        | 11     | 5.392  | 3     | 15     | 15   |
| Systolic blood pressure in ED       |               |            |        | 126    | 29882  | 110   | 130    | 145  |
|                                     | other         | 11         | 1.30%  |        |        |       |        |      |
|                                     | stab wound    | 1          | 0.10%  |        |        |       |        |      |
|                                     | gunshot       | 1          | 0.10%  |        |        |       |        |      |
|                                     | wound         |            |        |        |        |       |        |      |
|                                     | car accident  | 161        | 19.30% |        |        |       |        |      |
|                                     | bike          | 57         | 6.80%  |        |        |       |        |      |
| Trauma mechanisms                   | accident      |            |        |        |        |       |        |      |
|                                     | motorcycle    | 256        | 30.70% |        |        |       |        |      |
|                                     | accident      |            |        |        |        |       |        |      |
|                                     | pedestrian    | 121        | 14.50% |        |        |       |        |      |
|                                     | accident      |            |        |        |        |       |        |      |
|                                     | precipitation | 189        | 22.70% |        |        |       |        |      |
|                                     | crushing      | 6          | 0.70%  |        |        |       |        |      |
|                                     | no            | 47         | 5.60%  |        |        |       |        |      |
| Alcoholmia test positive            | yes           | 102        | 12.20% |        |        |       |        |      |
| BE                                  |               |            |        | -2.733 | 5.177  | -5.25 | -2.4   | 0.4  |
| Lactate values                      |               |            |        | 3.152  | 2.551  | 1.64  | 2.4    | 3.5  |
| E-FAST                              | no            | 622        | 74.60% |        |        |       |        |      |
|                                     | yes           | 188        | 22.50% |        |        |       |        |      |
| Chest X-ray                         | no            | 141        | 16.90% |        |        |       |        |      |
|                                     | yes           | 691        | 82.90% |        |        |       |        |      |
|                                     | no            | 100        | 12.00% |        |        |       |        |      |
| Torso CT                            | yes           | 732        | 87.80% |        |        |       |        |      |
| Decompressive mini-thoracotomy      | no            | 804        | 94.40% |        |        |       |        |      |
|                                     | yes           | 28         | 3.40%  |        |        |       |        |      |
| Right chest tube thoracostomy       | no            | 717        | 86.00% |        |        |       |        |      |
|                                     | yes           | 115        | 13.80% |        |        |       |        |      |
| Left chest tube thoracostomy        | no            | 714        | 85.60% |        |        |       |        |      |
|                                     | yes           | 118        | 14.10% |        |        |       |        |      |
| Emergency surgery                   | no            | 520        | 62.40% |        |        |       |        |      |
|                                     | yes           | 312        | 37.40% |        |        |       |        |      |
| n° rib fractures                    |               |            |        | 4.77   | 3.407  | 2     | 4      | 7    |
| Ribs fractures ≤2                   | no            | 576        | 69.10% |        |        |       |        |      |
|                                     | yes           | 256        | 30.70% |        |        |       |        |      |
| Rib fractures 3-5                   | no            | 536        | 64.30% |        |        |       |        |      |
|                                     | yes           | 296        | 35.50% |        |        |       |        |      |
| Rib fractures ≥6                    | no            | 547        | 65.50% |        |        |       |        |      |
|                                     | yes           | 280        | 33.60% |        |        |       |        |      |
| 1st and/or 2nd rib fractures        | no            | 509        | 61.00% |        |        |       |        |      |
|                                     | yes           | 322        | 38.60% |        |        |       |        |      |
| Bilateral rib fractures             | no            | 652        | 78.20% |        |        |       |        |      |
|                                     | yes           | 180        | 21.60% |        |        |       |        |      |
| Heart/large vessels injuries        | no            | 813        | 97.50% |        |        |       |        |      |
|                                     | yes           | 19         | 2.30%  |        |        |       |        |      |
| Pneumothorax                        | no            | 506        | 60.70% |        |        |       |        |      |
|                                     | yes           | 326        | 39.10% |        |        |       |        |      |
| Hemothorax                          | no            | 790        | 94.70% |        |        |       |        |      |
|                                     | yes           | 42         | 5.00%  |        |        |       |        |      |
| Hemopneumothorax                    | no            | 748        | 89.70% |        |        |       |        |      |
|                                     | yes           | 84         | 10.10% |        |        |       |        |      |
| Pulmonary contusion                 | no            | 438        | 52.50% |        |        |       |        |      |
|                                     | yes           | 394        | 47.20% |        |        |       |        |      |
| Scapula/clavicle/sternum fractures  | no            | 698        | 83.70% |        |        |       |        |      |
|                                     | yes           | 134        | 16.10% |        |        |       |        |      |
| Pleural effusion                    | no            | 689        | 82.60% |        |        |       |        |      |
|                                     | yes           | 142        | 17.00% |        |        |       |        |      |
| Isolated chest trauma               | no            | 666        | 70.90% |        |        |       |        |      |
|                                     | yes           | 166        | 19.90% |        |        |       |        |      |
| Abdomen trauma                      | no            | 446        | 53.50% |        |        |       |        |      |
|                                     | yes           | 386        | 46.30% |        |        |       |        |      |
| Head trauma                         | no            | 306        | 36.70% |        |        |       |        |      |
|                                     | yes           | 526        | 63.10% |        |        |       |        |      |
| Extremities trauma                  | no            | 260        | 31.20% |        |        |       |        |      |
|                                     | yes           | 572        | 68.60% |        |        |       |        |      |
| Chest AIS                           |               |            |        | 3      | 1      | 3     | 3      | 4    |
| Abdomen AIS                         |               |            |        | 3      | 1      | 2     | 2      | 3    |
| Head AIS                            |               |            |        | 3      | 1      | 2     | 3      | 4    |
| Extremities AIS                     |               |            |        | 3      | 1      | 2     | 2      | 4    |
| ISS                                 |               |            |        | 26     | 14     | 14    | 24     | 36   |
| Death Probability                   |               |            |        | 17.415 | 26.751 | 1.575 | 4.8    | 19   |
| Outcome                             | survived      | 755        | 90.80% |        |        |       |        |      |
|                                     | deceased      | 77         | 9.20%  |        |        |       |        |      |
| Invasive mechanical ventilation     | no            | 596        | 59.70% |        |        |       |        |      |
|                                     | yes           | 336        | 40.30% |        |        |       |        |      |
| Non invasive mechanical ventilation | no            | 569        | 68.30% |        |        |       |        |      |
|                                     | yes           | 181        | 21.70% |        |        |       |        |      |
