# Supplementary material for: Predictive Factors of Ventilatory Support in Chest Trauma
Source: MDPI journal article supplement (doi:10.3390/life11111154), 2021-10-29
Supplement: s1 [file s1]

Statistical software: IBM Corp., released 2020, IBM SPSS Statistics for Windows, version 27.0; Armonk, NY, IBM Corp.

Encoding: UTF-8.

## CTABLES

```
/VLABELS VARIABLES=Age Age≥65 Age≥75 ASA RTSprehospitalization SpO2prehospitalization
GCSprehospitalization RTSinED SpO2inED GCSinED SystolicbloodpressureinED TraumaMechanisms
Ethanolemiataestpositive BE Lactatevalues EFAST ChestXRay TorsoCT Decompressiveminithoracotomy
Rightchesttubethoracostomy Leftchesttubethoracostomy Emergencysurgery n°ribfractures
Ribfractures≤2
Ribfractures35 Ribfractures≥6 @1standor2ndribfractures Bilateralribfractures
Heartlargevesselsinjuries Pneumothorax Hemothorax Hemopneumothorax Pulmonarycontusion
Scapulaclaviclesternum Pleuraleffusion Isolatedchesttrauma Abdomentrauma Extremitytrauma
Headtrauma
ChestAIS98 AbdomeAIS98 HeadAIS98 ExtremityAIS98 ISS DEATHPROBABILITYTRISS98 Intubation NIMV
Outcome
DISPLAY=LABEL
/TABLE Age [MEAN, STDDEV, PTILE 25, MEDIAN, PTILE 75] + Age≥65 [COUNT F40.0, COLPCT.COUNT
PCT40.1] + Age≥75 [COUNT F40.0, COLPCT.COUNT PCT40.1] + ASA [COUNT F40.0, COLPCT.COUNT
PCT40.1] +
RTSprehospitalization [MEAN, STDDEV, PTILE 25, MEDIAN, PTILE 75] + SpO2prehospitalization [MEAN,
STDDEV, PTILE 25, MEDIAN, PTILE 75] + GCSprehospitalization [MEAN, STDDEV, PTILE 25, MEDIAN, PTILE
75] + RTSinED [MEAN, STDDEV, PTILE 25, MEDIAN, PTILE 75] + SpO2inED [MEAN, STDDEV, PTILE 25,
MEDIAN, PTILE 75] + GCSinED [MEAN, STDDEV, PTILE 25, MEDIAN, PTILE 75] + SystolicbloodpressureinED
[MEAN, STDDEV, PTILE 25, MEDIAN, PTILE 75] + TraumaMechanisms [COUNT F40.0, COLPCT.COUNT
PCT40.1] +
Ethanolemiataestpositive [COUNT F40.0, COLPCT.COUNT PCT40.1] + BE [MEAN, STDDEV, PTILE 25,
MEDIAN,
PTILE 75] + Lactatevalues [MEAN, STDDEV, PTILE 25, MEDIAN, PTILE 75] + EFAST [COUNT F40.0,
COLPCT.COUNT PCT40.1] + ChestXRay [COUNT F40.0, COLPCT.COUNT PCT40.1] + TorsoCT [COUNT F40.0,
COLPCT.COUNT PCT40.1] + Decompressiveminithoracotomy [COUNT F40.0, COLPCT.COUNT PCT40.1] +
Rightchesttubethoracostomy [COUNT F40.0, COLPCT.COUNT PCT40.1] + Leftchesttubethoracostomy
[COUNT
F40.0, COLPCT.COUNT PCT40.1] + Emergencysurgery [COUNT F40.0, COLPCT.COUNT PCT40.1] +
n°ribfractures [MEAN, STDDEV, PTILE 25, MEDIAN, PTILE 75] + Ribfractures≤2 [COUNT F40.0,
```

COLPCT.COUNT PCT40.1] + Ribfractures35 [COUNT F40.0, COLPCT.COUNT PCT40.1] + Ribfractures≥6  
 [COUNT  
 F40.0, COLPCT.COUNT PCT40.1] + @1standor2ndribfractures [COUNT F40.0, COLPCT.COUNT PCT40.1] +  
 Bilateralribfractures [COUNT F40.0, COLPCT.COUNT PCT40.1] + Heartlargevesselsinjuries [COUNT F40.0,  
 COLPCT.COUNT PCT40.1] + Pneumothorax [COUNT F40.0, COLPCT.COUNT PCT40.1] + Hemothorax  
 [COUNT F40.0,  
 COLPCT.COUNT PCT40.1] + Hemopneumothorax [COUNT F40.0, COLPCT.COUNT PCT40.1] +  
 Pulmonarycontusion  
 [COUNT F40.0, COLPCT.COUNT PCT40.1] + Scapulaclaviclesternum [COUNT F40.0, COLPCT.COUNT  
 PCT40.1] +  
 Pleuraleffusion [COUNT F40.0, COLPCT.COUNT PCT40.1] + Isolatedchesttrauma [COUNT F40.0,  
 COLPCT.COUNT PCT40.1] + Abdomentrauma [COUNT F40.0, COLPCT.COUNT PCT40.1] + Extremitytrauma  
 [COUNT  
 F40.0, COLPCT.COUNT PCT40.1] + Headtrauma [COUNT F40.0, COLPCT.COUNT PCT40.1] + ChestAIS98  
 [MEAN,  
 STDDEV, PTILE 25, MEDIAN, PTILE 75] + AbdomeAIS98 [MEAN, STDDEV, PTILE 25, MEDIAN, PTILE 75] +  
 HeadAIS98 [MEAN, STDDEV, PTILE 25, MEDIAN, PTILE 75] + ExtremityAIS98 [MEAN, STDDEV, PTILE 25,  
 MEDIAN, PTILE 75] + ISS [MEAN, STDDEV, PTILE 25, MEDIAN, PTILE 75] + DEATHPROBABILITYTRISS98  
 [MEAN,  
 STDDEV, PTILE 25, MEDIAN, PTILE 75] BY Intubation + NIMV + Outcome  
 /CATEGORIES VARIABLES=Age≥65 Age≥75 ASA TraumaMechanisms Ethanolemiataestpositive EFAST  
 ChestXRay  
 TorsoCT Decompressiveminihthoracotomy Rightchesttubethoracostomy Leftchesttubethoracostomy  
 Emergencysurgery Ribfractures≤2 Ribfractures35 Ribfractures≥6 @1standor2ndribfractures  
 Bilateralribfractures Heartlargevesselsinjuries Pneumothorax Hemothorax Hemopneumothorax  
 Pulmonarycontusion Scapulaclaviclesternum Pleuraleffusion Isolatedchesttrauma Abdomentrauma  
 Extremitytrauma Headtrauma Intubation NIMV Outcome ORDER=A KEY=VALUE EMPTY=EXCLUDE  
 /CRITERIA CILEVEL=95.

\* Encoding: UTF-8.

CROSSTABS

/TABLES=Gender Age≥65 Age≥75 ASA TraumaMechanisms Ethanolemiataestpositive EFAST ChestXRay  
 TorsoCT  
 Decompressiveminihthoracotomy Rightchesttubethoracostomy Leftchesttubethoracostomy  
 Emergencysurgery

Ribfractures≤2 Ribfractures35 Ribfractures≥6 @1standor2ndribfractures Bilateralribfractures  
Heartlargevesselsinjuries Pneumothorax Hemothorax Hemopneumothorax Pulmonarycontusion  
Scapulaclaviclesternum Pleuraleffusion Isolatedchesttrauma Abdomentrauma Extremitytrauma  
Headtrauma

BY Intubation

/FORMAT=AVALUE TABLES

/STATISTICS=CHISQ

/CELLS=COUNT

/COUNT ROUND CELL.

CROSSTABS

/TABLES=Gender Age≥65 Age≥75 ASA TraumaMechanisms Ethanolemia testpositive EFAST ChestXRay  
TorsoCT

Decompressivemini thoracotomy Rightchesttubethoracostomy Leftchesttubethoracostomy  
Emergency surgery

Ribfractures≤2 Ribfractures35 Ribfractures≥6 @1standor2ndribfractures Bilateralribfractures  
Heartlargevesselsinjuries Pneumothorax Hemothorax Hemopneumothorax Pulmonarycontusion  
Scapulaclaviclesternum Pleuraleffusion Isolatedchesttrauma Abdomentrauma Extremitytrauma  
Headtrauma

Intubation BY NIMV

/FORMAT=AVALUE TABLES

/STATISTICS=CHISQ

/CELLS=COUNT

/COUNT ROUND CELL.

CROSSTABS

/TABLES=Gender Age≥65 Age≥75 ASA TraumaMechanisms Ethanolemia testpositive EFAST ChestXRay  
TorsoCT

Decompressivemini thoracotomy Rightchesttubethoracostomy Leftchesttubethoracostomy  
Emergency surgery

Ribfractures≤2 Ribfractures35 Ribfractures≥6 @1standor2ndribfractures Bilateralribfractures  
Heartlargevesselsinjuries Pneumothorax Hemothorax Hemopneumothorax Pulmonarycontusion  
Scapulaclaviclesternum Pleuraleffusion Isolatedchesttrauma Abdomentrauma Extremitytrauma  
Headtrauma

Intubation BY Outcome

/FORMAT=AVALUE TABLES

/STATISTICS=CHISQ

/CELLS=COUNT

/COUNT ROUND CELL.

\*Nonparametric Tests: Independent Samples.

NPTESTS

/INDEPENDENT TEST (Age RTSprehospitalization SpO2prehospitalization GCSprehospitalization RTSinED  
SpO2inED GCSinED SystolicbloodpressureinED BE Lactatevalues n°ribfractures ChestAIS98 AbdomeAIS98  
HeadAIS98 ExtremityAIS98 ISS DEATHPROBABILITYTRISS98) GROUP (Intubation) MANN\_WHITNEY  
MEDIAN(TESTVALUE=SAMPLE COMPARE=PAIRWISE)  
/MISSING SCOPE=ANALYSIS USERMISSING=EXCLUDE  
/CRITERIA ALPHA=0.05 CILEVEL=95.

\*Nonparametric Tests: Independent Samples.

NPTESTS

/INDEPENDENT TEST (Age RTSprehospitalization SpO2prehospitalization GCSprehospitalization RTSinED  
SpO2inED GCSinED SystolicbloodpressureinED BE Lactatevalues n°ribfractures ChestAIS98 AbdomeAIS98  
HeadAIS98 ExtremityAIS98 ISS DEATHPROBABILITYTRISS98) GROUP (NIMV) MANN\_WHITNEY  
MEDIAN(TESTVALUE=SAMPLE COMPARE=PAIRWISE)  
/MISSING SCOPE=ANALYSIS USERMISSING=EXCLUDE  
/CRITERIA ALPHA=0.05 CILEVEL=95.

\*Nonparametric Tests: Independent Samples.

NPTESTS

/INDEPENDENT TEST (Age RTSprehospitalization SpO2prehospitalization GCSprehospitalization RTSinED

SpO2inED GCSinED SystolicbloodpressureinED BE Lactatevalues n°ribfractures ChestAIS98 AbdomeAIS98  
 HeadAIS98 ExtremityAIS98 ISS DEATHPROBABILITYTRISS98) GROUP (Outcome) MANN\_WHITEY  
 /MISSING SCOPE=ANALYSIS USERMISSING=EXCLUDE  
 /CRITERIA ALPHA=0.05 CILEVEL=95.

#### LOGISTIC REGRESSION VARIABLES Intubation

/METHOD=ENTER SpO2prehospitalization RTSprehospitalization RTSinED SpO2inED BE Lactatevalues  
 Decompressiveminitthoracotomy n°ribfractures @1standor2ndribfractures Bilateralribfractures  
 Heartlargevesselsinjuries Pneumothorax Hemothorax Hemopneumothorax Pulmonarycontusion  
 Scapulaclaviclesternum Pleuraleffusion Isolatedchesttrauma Abdomentrauma Headtrauma  
 Extremitytrauma  
 ISS  
 /CONTRAST (Decompressiveminitthoracotomy)=Indicator(1)  
 /CONTRAST (@1standor2ndribfractures)=Indicator(1)  
 /CONTRAST (Bilateralribfractures)=Indicator(1)  
 /CONTRAST (Heartlargevesselsinjuries)=Indicator(1)  
 /CONTRAST (Pneumothorax)=Indicator(1)  
 /CONTRAST (Hemothorax)=Indicator(1)  
 /CONTRAST (Hemopneumothorax)=Indicator(1)  
 /CONTRAST (Pulmonarycontusion)=Indicator(1)  
 /CONTRAST (Scapulaclaviclesternum)=Indicator(1)  
 /CONTRAST (Pleuraleffusion)=Indicator(1)  
 /CONTRAST (Isolatedchesttrauma)=Indicator(1)  
 /CONTRAST (Abdomentrauma)=Indicator(1)  
 /CONTRAST (Extremitytrauma)=Indicator(1)  
 /CONTRAST (Headtrauma)=Indicator(1)  
 /CRITERIA=PIN(.05) POUT(.10) ITERATE(20) CUT(.5).

#### LOGISTIC REGRESSION VARIABLES Intubation

/METHOD=ENTER n°ribfractures @1standor2ndribfractures Bilateralribfractures

Heartlargevesselsinjuries Pneumothorax Hemothorax Hemopneumothorax Pulmonarycontusion  
Scapulaclaviclesternum Pleuraleffusion Isolatedchesttrauma Abdomentrauma Headtrauma  
Extremitytrauma

/CONTRAST (@1standor2ndribfractures)=Indicator(1)

/CONTRAST (Bilateralribfractures)=Indicator(1)

/CONTRAST (Heartlargevesselsinjuries)=Indicator(1)

/CONTRAST (Pneumothorax)=Indicator(1)

/CONTRAST (Hemothorax)=Indicator(1)

/CONTRAST (Hemopneumothorax)=Indicator(1)

/CONTRAST (Pulmonarycontusion)=Indicator(1)

/CONTRAST (Scapulaclaviclesternum)=Indicator(1)

/CONTRAST (Pleuraleffusion)=Indicator(1)

/CONTRAST (Isolatedchesttrauma)=Indicator(1)

/CONTRAST (Abdomentrauma)=Indicator(1)

/CONTRAST (Extremitytrauma)=Indicator(1)

/CONTRAST (Headtrauma)=Indicator(1)

/CRITERIA=PIN(.05) POUT(.10) ITERATE(20) CUT(.5).

LOGISTIC REGRESSION VARIABLES Intubation

/METHOD=ENTER SpO2prehospitalization GCSprehospitalization SpO2inED GCSinED

SystolicbloodpressureinED BE Lactatevalues

/CRITERIA=PIN(.05) POUT(.10) ITERATE(20) CUT(.5).

LOGISTIC REGRESSION VARIABLES NIMV

/METHOD=ENTER SpO2prehospitalization RTSprehospitalization RTSinED Lactatevalues BE

Decompressiveminithoracotomy Rightchesttubethoracostomy Leftchesttubethoracostomy n°ribfractures

@1standor2ndribfractures Bilateralribfractures Pneumothorax Hemothorax Pulmonarycontusion

Scapulaclaviclesternum Pleuraleffusion Isolatedchesttrauma Abdomentrauma Extremitytrauma ISS

Intubation

/CONTRAST (@1standor2ndribfractures)=Indicator(1)

/CONTRAST (Bilateralribfractures)=Indicator(1)

/CONTRAST (Pneumothorax)=Indicator(1)

```

/CONTRAST (Hemothorax)=Indicator(1)
/CONTRAST (Pulmonarycontusion)=Indicator(1)
/CONTRAST (Scapulaclaviclesternum)=Indicator(1)
/CONTRAST (Pleuraleffusion)=Indicator(1)
/CONTRAST (Isolatedchesttrauma)=Indicator(1)
/CONTRAST (Abdomentrauma)=Indicator(1)
/CONTRAST (Extremitytrauma)=Indicator(1)
/CONTRAST (Decompressiveminithoracotomy)=Indicator(1)
/CONTRAST (Rightchesttubethoracostomy)=Indicator(1)
/CONTRAST (Leftchesttubethoracostomy)=Indicator(1)
/CONTRAST (Intubation)=Indicator(1)
/CRITERIA=PIN(.05) POUT(.10) ITERATE(20) CUT(.5).

```

#### LOGISTIC REGRESSION VARIABLES Outcome

```

/METHOD=ENTER Age≥65 ASA n°ribfractures Bilateralribfractures Hemothorax Pulmonarycontusion
Pleuraleffusion Isolatedchesttrauma Abdomentrauma Headtrauma
/CONTRAST (Bilateralribfractures)=Indicator(1)
/CONTRAST (Hemothorax)=Indicator(1)
/CONTRAST (Pulmonarycontusion)=Indicator(1)
/CONTRAST (Pleuraleffusion)=Indicator(1)
/CONTRAST (Isolatedchesttrauma)=Indicator(1)
/CONTRAST (Abdomentrauma)=Indicator(1)
/CONTRAST (Age≥65)=Indicator(1)
/CONTRAST (ASA)=Indicator(1)
/CONTRAST (Headtrauma)=Indicator(1)
/CRITERIA=PIN(.05) POUT(.10) ITERATE(20) CUT(.5).

```
